# Supplementary material
Source: Research Square preprint supplement (doi:10.21203/rs.3.rs-8971136/v1)
Supplement: Supplementary file 1 [file 5e2e06ee9b4b8b836f163d25.pdf]

967 **Supplementary Information**

968

969 Supplementary Information for “A hydrogeologic tipping point controls  
970 climate-driven saltwater intrusion”

971

972 Chuyang Liu<sup>1,\*</sup>, Steven B. Yabusaki<sup>2</sup>, Christopher G. Patterson<sup>3</sup>, Erika H. Beyer<sup>4</sup>,  
973 Daniel M. Tartakovsky<sup>5</sup>, Dipankar Dwivedi<sup>1</sup>

974

975

976

977 <sup>1</sup>Geochemistry Department, Lawrence Berkeley National Laboratory, Berkeley,  
978 California 94720, USA.

979 <sup>2</sup>Earth Systems Science, Pacific Northwest National Laboratory, Richland,  
980 Washington 99352, USA.

981 <sup>3</sup>Department of Shore Security, Naval Facilities Engineering and Expeditionary  
982 Warfare Center, Port Hueneme, California 93043, USA.

983 <sup>4</sup>Water Resources and Planning, Santa Ana Watershed Project Authority, Riverside,  
984 California 92503, USA.

985 <sup>5</sup>Department of Energy Science and Engineering, Stanford University, Stanford,  
986 California 94035, USA.

987

988

989

990

991

992

993

994

995

996

997

998

999

1000

1001

1002

1003

1004

1005

1006

1007

1008

1009

1010

1011

1012

## Supplementary Section 1: Model accuracy

Among 200 historical simulations, we selected the best-fitting realization as the base model. Field measurements of groundwater elevation and salinity were obtained from the Naval Installation Restoration Information Solution (NIRIS) database [36]. These data were collected from monitoring wells across multiple sites as part of various environmental restoration programs [43]. However, we noticed that differences in monitoring objectives, remediation strategies, and the site histories resulted in substantial variability in the spatial and temporal resolution of the available data. In addition, vertical datums and casing-top elevations are not consistently reported in the database. To fill these data gaps, we used a 1-m resolution digital elevation model (DEM) model from the U.S. Geological Survey with the NAVD88 datum [44]. To minimize uncertainty, we identified and removed potential outliers and artifacts by cross-checking measurements with adjacent wells (within 200 m).

We evaluated the model performance for groundwater flow by comparing simulated water levels with 5,207 measurements from seven monitoring well clusters (Fig. S6). We defined the water level residual as the difference between the observed and simulated water level and calculated it for each measurement. Our results show that the median and mean residual in most clusters are close to zero ( $\leq 0.47$  m), indicating a good agreement between model and observations (Fig. S7, Table S2). Spatially, average residuals are typically moderate (light green to light yellow color in Fig. S8), particularly in wells near the shoreline.

We then evaluated the model performance for salinity transport by a similar approach across four monitoring well clusters (Fig. S9). Since the measurement depths were not consistently reported in the database, we heuristically compared observations to the best-matching simulated salinity along each well's vertical profile. Our results show the median and mean salinity residual are typically less than 1.2 PSU, suggesting that the model can effectively capture salinity transport dynamics (Fig. S10, Table S3). Spatially, monitoring wells near the shoreline also typically show moderate average residuals ( $< 1$  PSU; light orange color in Fig. S11).

## Supplementary Section 2: Water flow and salinity transport models

We simulated water flow and salinity transport in a coastal aquifer by a refined 3D unstructured mesh and a conditional seepage boundary condition to capture dynamic interactions with the sea. When the tidal water level exceeds the local ground surface elevation, a Dirichlet pressure boundary condition was applied to simulate coastal inundation. Conversely, groundwater can exfiltrate the ground surface when subsurface water pressure is above atmospheric pressure.

To capture complex boundary geometry and topographic variations, we generated a terrain-following 3D unstructured mesh by Watershed Workflow (WW)[45], with surface elevations derived from the 1-m resolution DEM. This mesh was densely refined in coastal regions (minimum mesh cell edge length of 0.1 m) to better resolve complex boundary geometry and saltwater-freshwater mixing zones, while a coarser mesh was

1013  
1014  
1015  
1016  
1017  
1018  
1019  
1020  
1021  
1022  
1023  
1024  
1025  
1026  
1027  
1028  
1029  
1030  
1031  
1032  
1033  
1034  
1035  
1036  
1037  
1038  
1039  
1040  
1041  
1042  
1043  
1044  
1045  
1046  
1047  
1048  
1049  
1050  
1051  
1052  
1053  
1054  
1055  
1056  
1057  
1058

1059 kept in the interior domain to account for recharge and regional subsurface freshwater  
1060 flow efficiently.

1061 To improve the estimation of vertical infiltration, we assigned a uniform cell thick-  
1062 ness of 0.1 m to the top two soil layers. Remaining cells within the top 4 m of soil were  
1063 assigned a uniform thickness of 0.2 m. Below this depth, subsequent cells had vary-  
1064 ing cell thicknesses, gradually increasing from 0.5 m to 1 m, and then to 2 m, until  
1065 reaching a flat domain bottom at -14 m.

1066 Since WW-generated mesh is not directly compatible with PFLOTRAN, we used  
1067 the Mesh Toolkit [46] and exodus2pflotran tool [47] to convert the mesh format. The  
1068 latter was modified to conform to PFLOTRAN's requirements for vertex ordering and  
1069 data structure.

1070 To get a reasonable initial state for various parameter sets, we spun up each model  
1071 until it reached a quasi-steady state. The hydrostatic pressure was initially assigned  
1072 based on measured tidal elevations from January 1, 2017. A zero salinity concentration  
1073 was applied throughout the domain, representing a freshwater system. We used a cyclic  
1074 spin-up method, repeatedly simulating the first two years of the entire simulation  
1075 period.

1076  
1077  
1078  
1079  
1080  
1081  
1082  
1083  
1084  
1085  
1086  
1087  
1088  
1089  
1090  
1091  
1092  
1093  
1094  
1095  
1096  
1097  
1098  
1099  
1100  
1101  
1102  
1103  
1104

Supplementary Figures

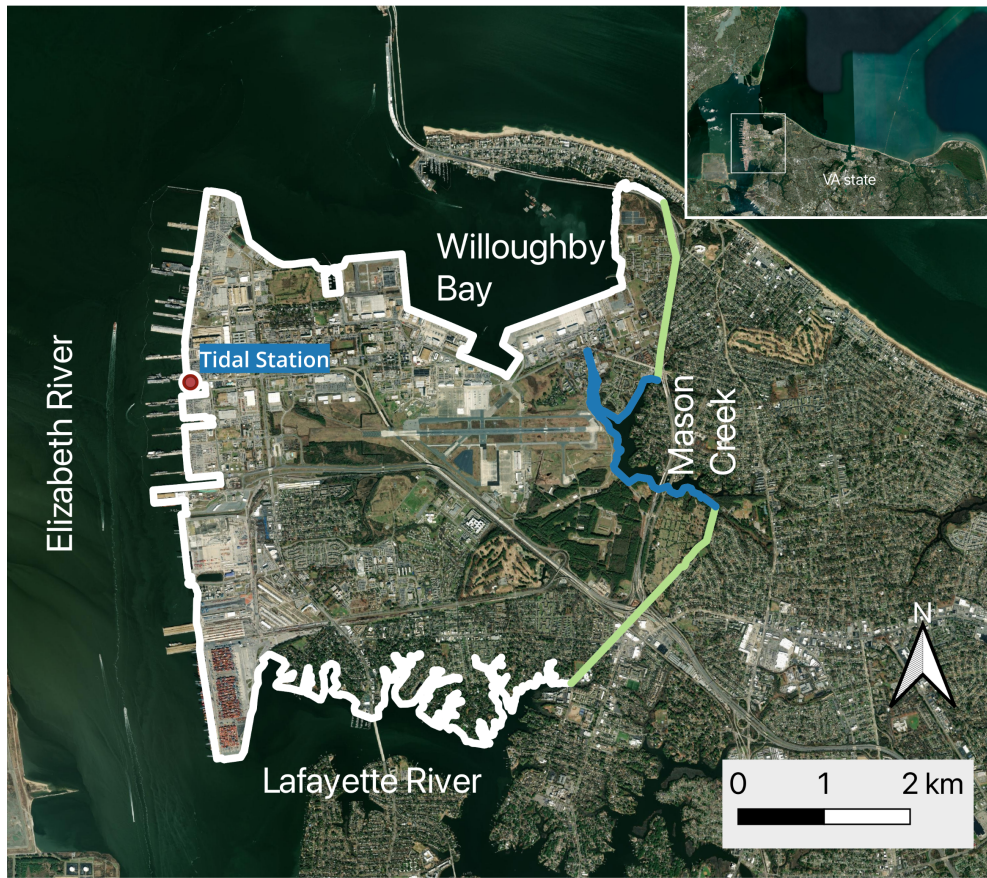

**Fig. S1 Study area in Norfolk, Virginia, USA.** The white outline delineates the modeled shoreline, which is bounded by Willoughby Bay, Elizabeth River, and Lafayette River. The red point indicates the National Oceanic and Atmospheric Administration (NOAA) tidal station location. Mason Creek is highlighted in blue, and two inland segments are shown in green. The inset map shows the location of the study area within Virginia. Maps were created by QGIS 3.4[48].

1105  
1106  
1107  
1108  
1109  
1110  
1111  
1112  
1113  
1114  
1115  
1116  
1117  
1118  
1119  
1120  
1121  
1122  
1123  
1124  
1125  
1126  
1127  
1128  
1129  
1130  
1131  
1132  
1133  
1134  
1135  
1136  
1137  
1138  
1139  
1140  
1141  
1142  
1143  
1144  
1145  
1146  
1147  
1148  
1149  
1150

1151  
1152  
1153  
1154  
1155  
1156  
1157  
1158  
1159  
1160  
1161  
1162  
1163  
1164  
1165  
1166  
1167  
1168  
1169  
1170  
1171  
1172  
1173  
1174  
1175  
1176  
1177  
1178  
1179  
1180  
1181  
1182  
1183  
1184  
1185  
1186  
1187  
1188  
1189  
1190  
1191  
1192  
1193  
1194  
1195  
1196

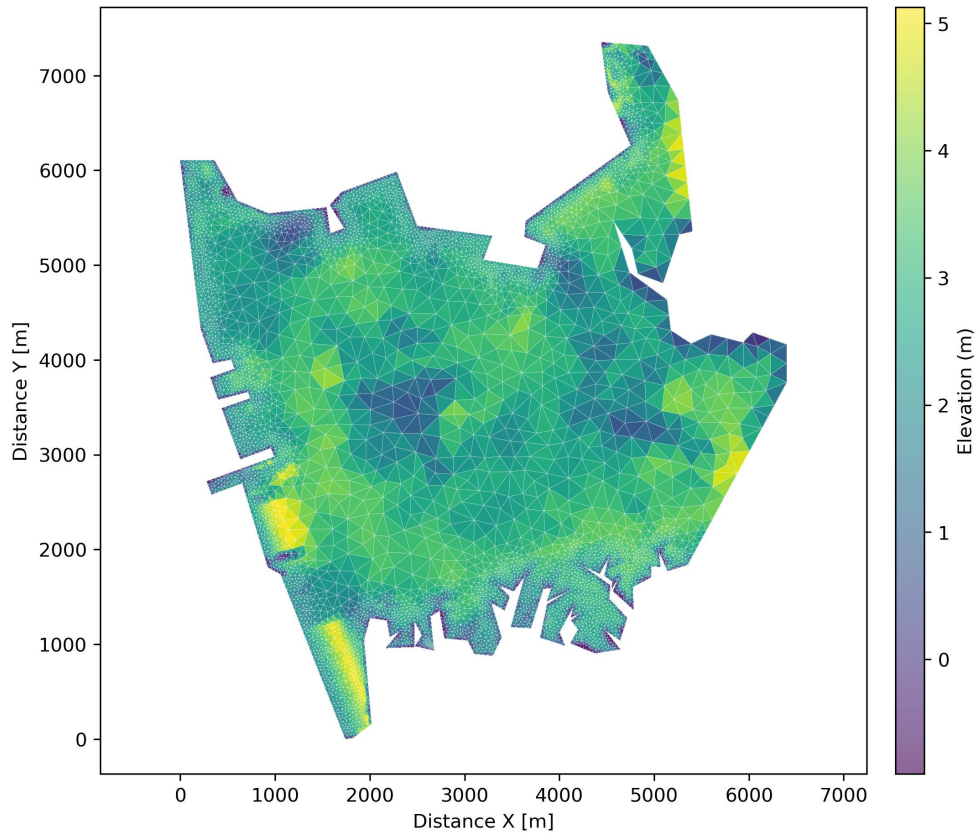

Fig. S2 Surface elevation of the study area.

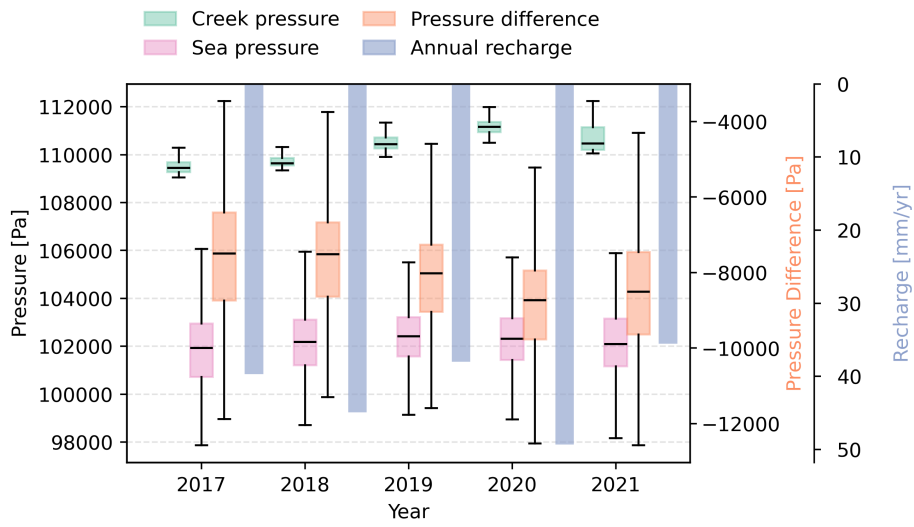

**Fig. S3 Interannual variability of key drivers of salinity dynamics.** The cyan and pink boxes show the pressure of the creek and sea, respectively. The orange box represents the pressure difference between the sea and the creek. The blue bar indicated the annual total groundwater recharge.

1197  
 1198  
 1199  
 1200  
 1201  
 1202  
 1203  
 1204  
 1205  
 1206  
 1207  
 1208  
 1209  
 1210  
 1211  
 1212  
 1213  
 1214  
 1215  
 1216  
 1217  
 1218  
 1219  
 1220  
 1221  
 1222  
 1223  
 1224  
 1225  
 1226  
 1227  
 1228  
 1229  
 1230  
 1231  
 1232  
 1233  
 1234  
 1235  
 1236  
 1237  
 1238  
 1239  
 1240  
 1241  
 1242

1243  
 1244  
 1245  
 1246  
 1247  
 1248  
 1249  
 1250  
 1251  
 1252  
 1253  
 1254  
 1255  
 1256  
 1257  
 1258  
 1259  
 1260  
 1261  
 1262  
 1263  
 1264  
 1265  
 1266  
 1267  
 1268  
 1269  
 1270  
 1271  
 1272  
 1273  
 1274  
 1275  
 1276  
 1277  
 1278  
 1279  
 1280  
 1281  
 1282  
 1283  
 1284  
 1285  
 1286  
 1287  
 1288

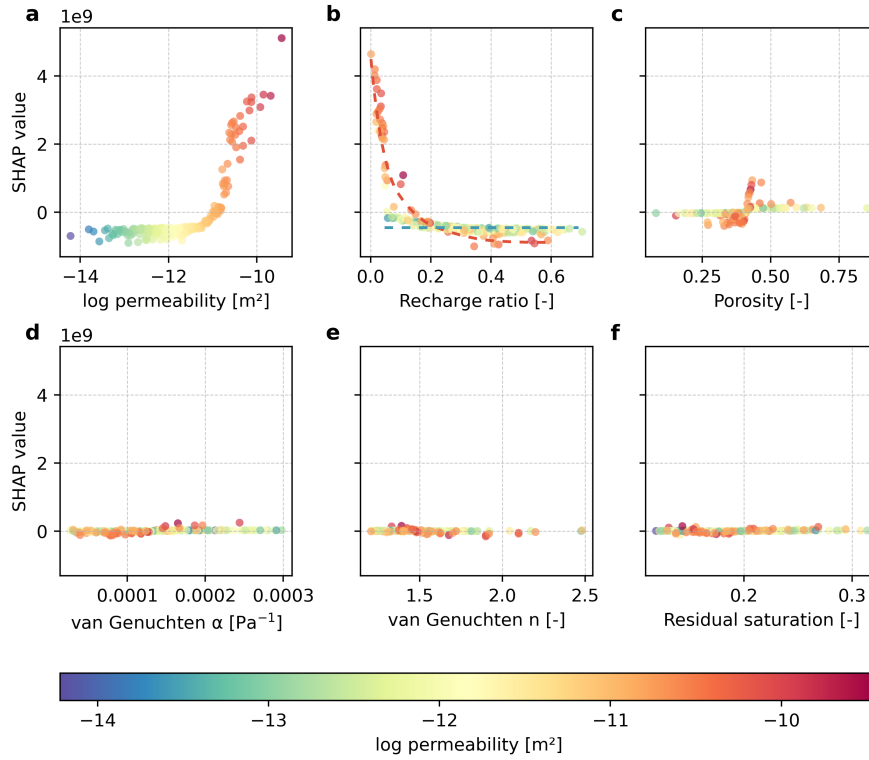

**Fig. S4 Permeability and recharge are two dominant drivers in salinization.** (a-f) Relative contribution of (a) permeability, (b) recharge ratio, (c) porosity, (d) van Genuchten  $\alpha$ , (e) van Genuchten  $n$ , and (f) residual saturation on extreme salinization mass (ESM). The order of subplots is ranked by the average absolute SHAP values in descending order, representing the average impact of each variable on ESM. Orange and blue dashed lines in subplot b show two contribution patterns under different permeability ranges.

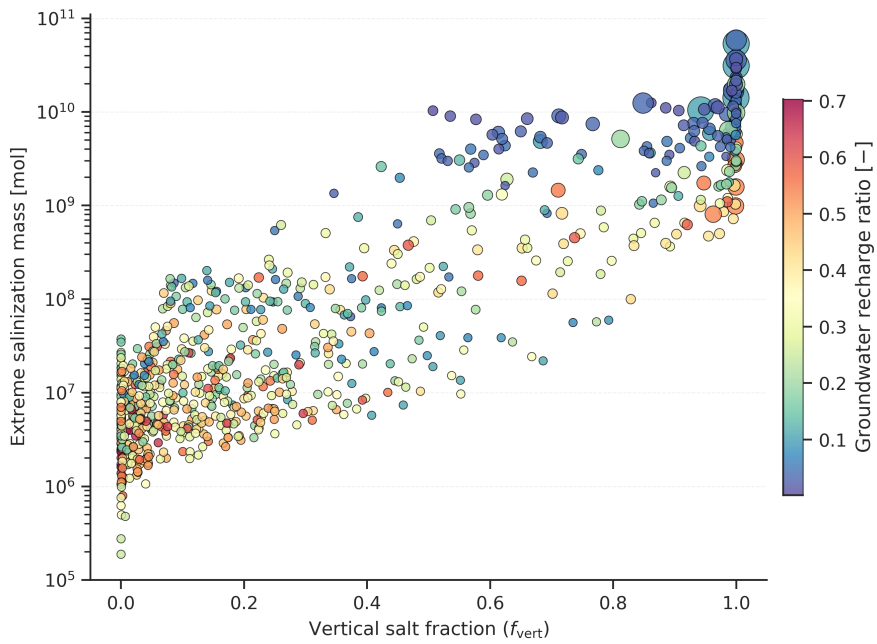

**Fig. S5 Pathway dominance controls salinization severity. Extreme salinization mass over vertical salt fraction.**

1289  
 1290  
 1291  
 1292  
 1293  
 1294  
 1295  
 1296  
 1297  
 1298  
 1299  
 1300  
 1301  
 1302  
 1303  
 1304  
 1305  
 1306  
 1307  
 1308  
 1309  
 1310  
 1311  
 1312  
 1313  
 1314  
 1315  
 1316  
 1317  
 1318  
 1319  
 1320  
 1321  
 1322  
 1323  
 1324  
 1325  
 1326  
 1327  
 1328  
 1329  
 1330  
 1331  
 1332  
 1333  
 1334

1335  
1336  
1337  
1338  
1339  
1340  
1341  
1342  
1343  
1344  
1345  
1346  
1347  
1348  
1349  
1350  
1351  
1352  
1353  
1354  
1355  
1356  
1357  
1358  
1359  
1360  
1361  
1362  
1363  
1364  
1365  
1366  
1367  
1368  
1369  
1370  
1371  
1372  
1373  
1374  
1375  
1376  
1377  
1378  
1379  
1380

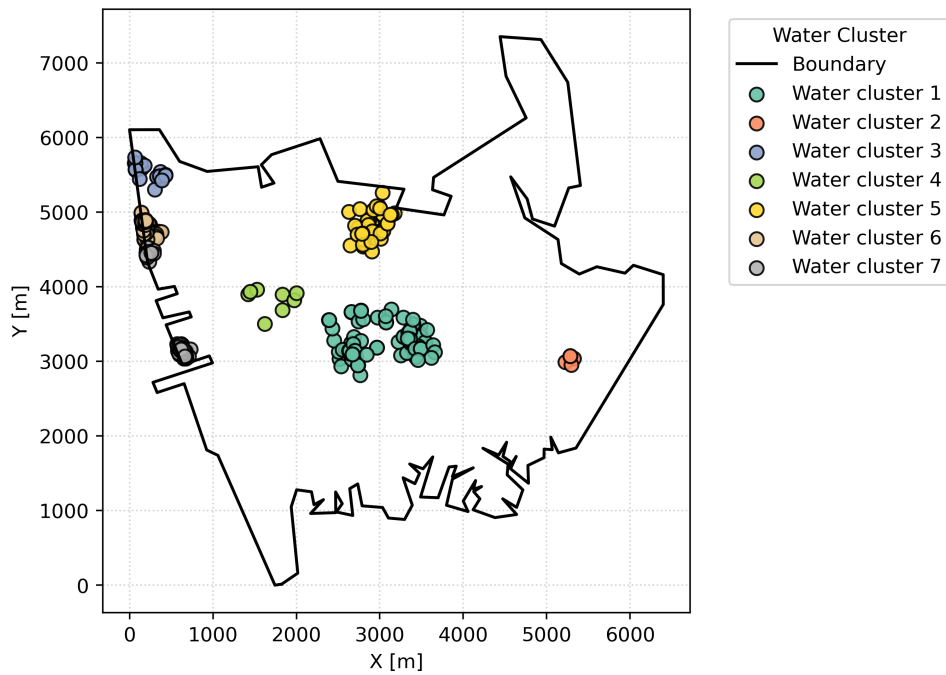

**Fig. S6 Spatial distribution of monitoring well clusters for groundwater level measurements.** The black solid line represents the boundary of the simulation domain. Point scatters highlight the location of monitoring wells. The color of the point indicates the classification of the monitoring well cluster.

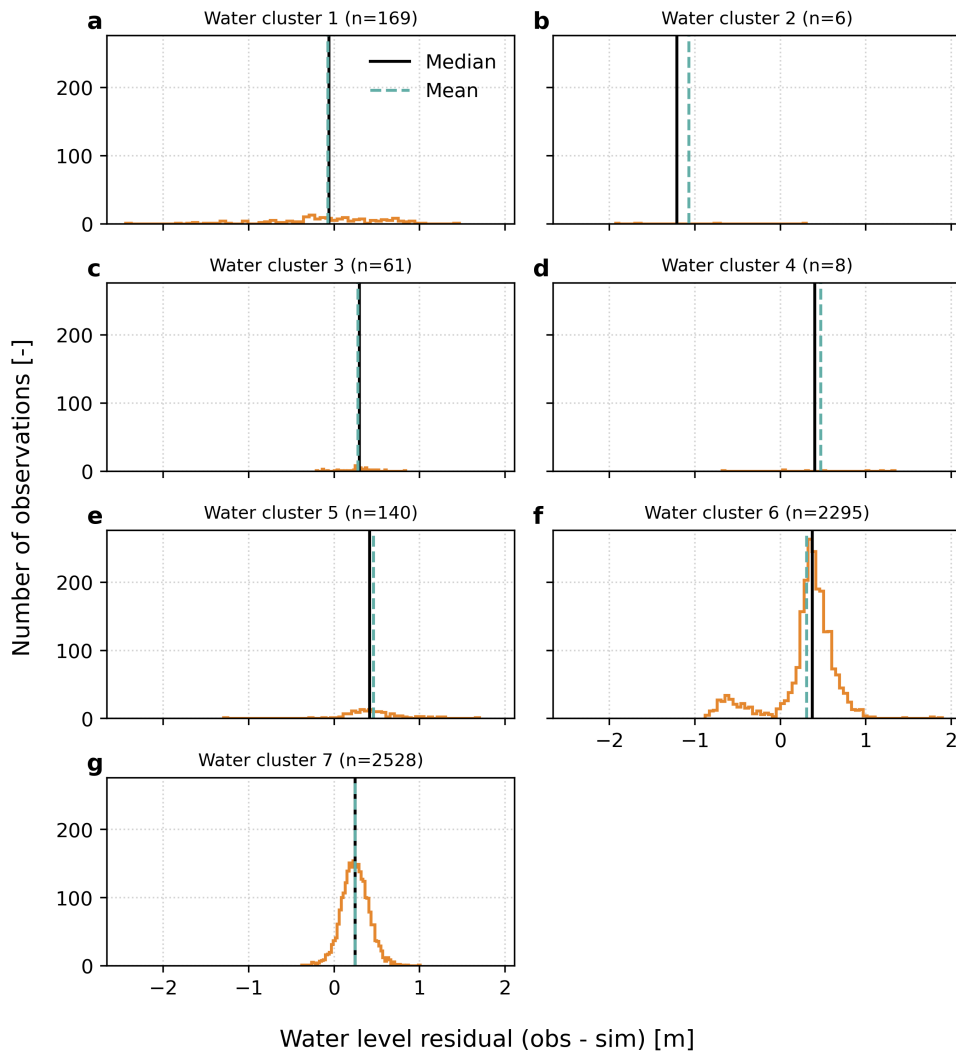

**Fig. S7** The histograms of water level residual for seven water clusters. Water level residual is defined as the difference between observed and simulated water levels. The cyan dashed line represents the mean water level residuals for each water cluster. The black solid line indicates the median of water level residuals for each water cluster. The number in the bracelet shows the total measurements for each cluster.

1381  
 1382  
 1383  
 1384  
 1385  
 1386  
 1387  
 1388  
 1389  
 1390  
 1391  
 1392  
 1393  
 1394  
 1395  
 1396  
 1397  
 1398  
 1399  
 1400  
 1401  
 1402  
 1403  
 1404  
 1405  
 1406  
 1407  
 1408  
 1409  
 1410  
 1411  
 1412  
 1413  
 1414  
 1415  
 1416  
 1417  
 1418  
 1419  
 1420  
 1421  
 1422  
 1423  
 1424  
 1425  
 1426

1427  
1428  
1429  
1430  
1431  
1432  
1433  
1434  
1435  
1436  
1437  
1438  
1439  
1440  
1441  
1442  
1443  
1444  
1445  
1446  
1447  
1448  
1449  
1450  
1451  
1452  
1453  
1454  
1455  
1456  
1457  
1458  
1459  
1460  
1461  
1462  
1463  
1464  
1465  
1466  
1467  
1468  
1469  
1470  
1471  
1472

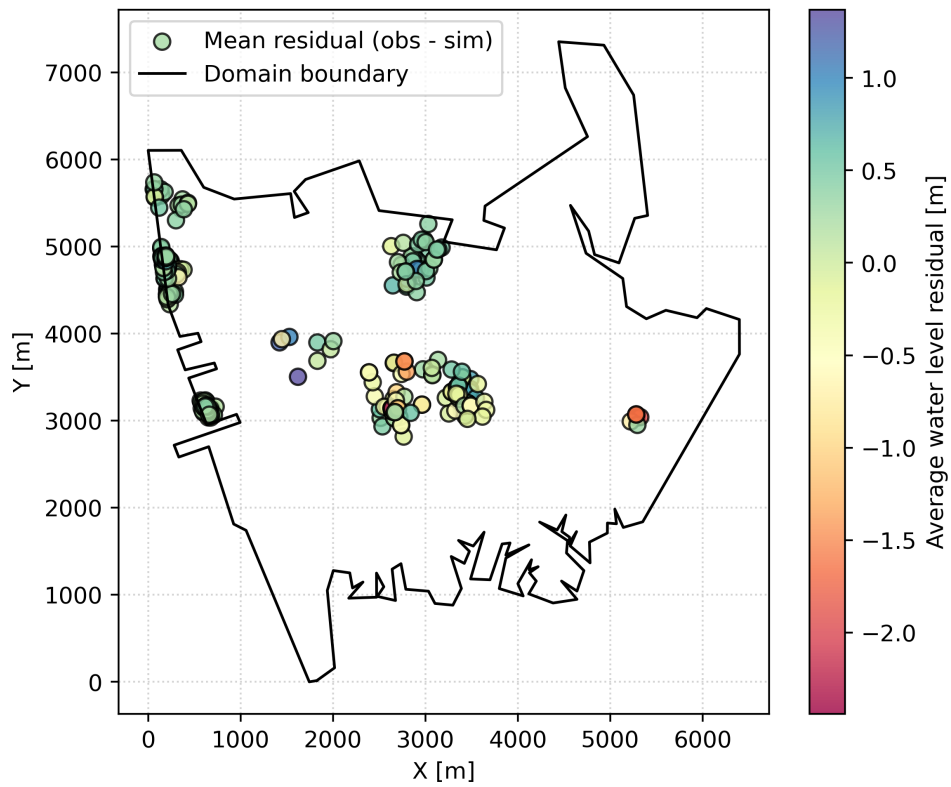

**Fig. S8** The spatial distribution of the average water level residual. Water level residual is defined as the difference between observed and simulated water levels. Water level residual is averaged for each monitoring well. The black solid line represents the boundary of the model domain.

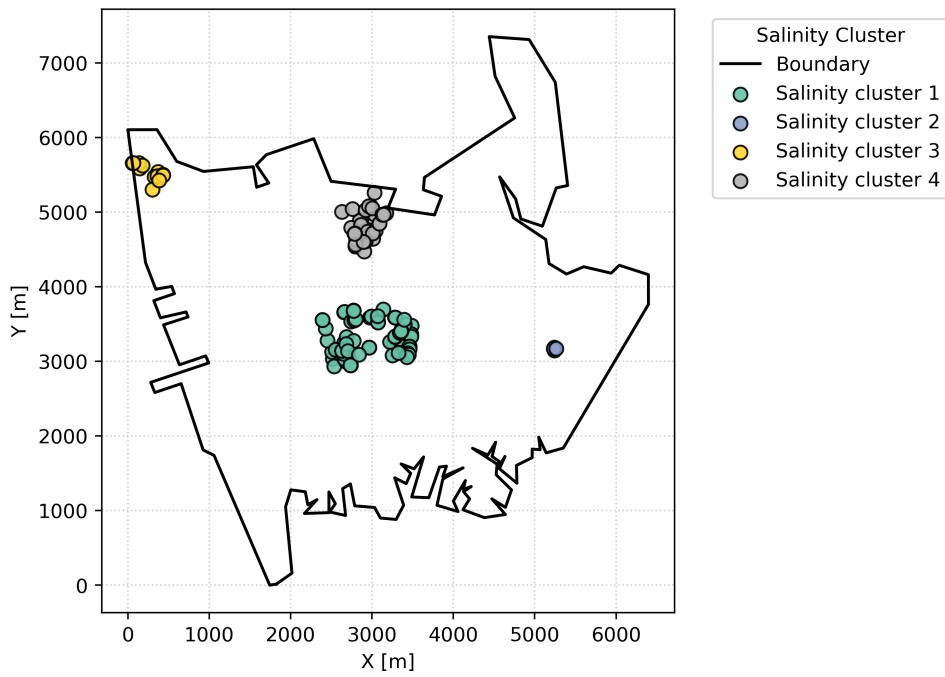

**Fig. S9 Spatial distribution of monitoring well clusters for salinity measurements.** The black dashed lines represent the boundary of the simulation domain. Point scatters highlight the location of monitoring wells. The color of the point indicates the classification of the monitoring well cluster.

1473  
 1474  
 1475  
 1476  
 1477  
 1478  
 1479  
 1480  
 1481  
 1482  
 1483  
 1484  
 1485  
 1486  
 1487  
 1488  
 1489  
 1490  
 1491  
 1492  
 1493  
 1494  
 1495  
 1496  
 1497  
 1498  
 1499  
 1500  
 1501  
 1502  
 1503  
 1504  
 1505  
 1506  
 1507  
 1508  
 1509  
 1510  
 1511  
 1512  
 1513  
 1514  
 1515  
 1516  
 1517  
 1518

1519  
 1520  
 1521  
 1522  
 1523  
 1524  
 1525  
 1526  
 1527  
 1528  
 1529  
 1530  
 1531  
 1532  
 1533  
 1534  
 1535  
 1536  
 1537  
 1538  
 1539  
 1540  
 1541  
 1542  
 1543  
 1544  
 1545  
 1546  
 1547  
 1548  
 1549  
 1550  
 1551  
 1552  
 1553  
 1554  
 1555  
 1556  
 1557  
 1558  
 1559  
 1560  
 1561  
 1562  
 1563  
 1564

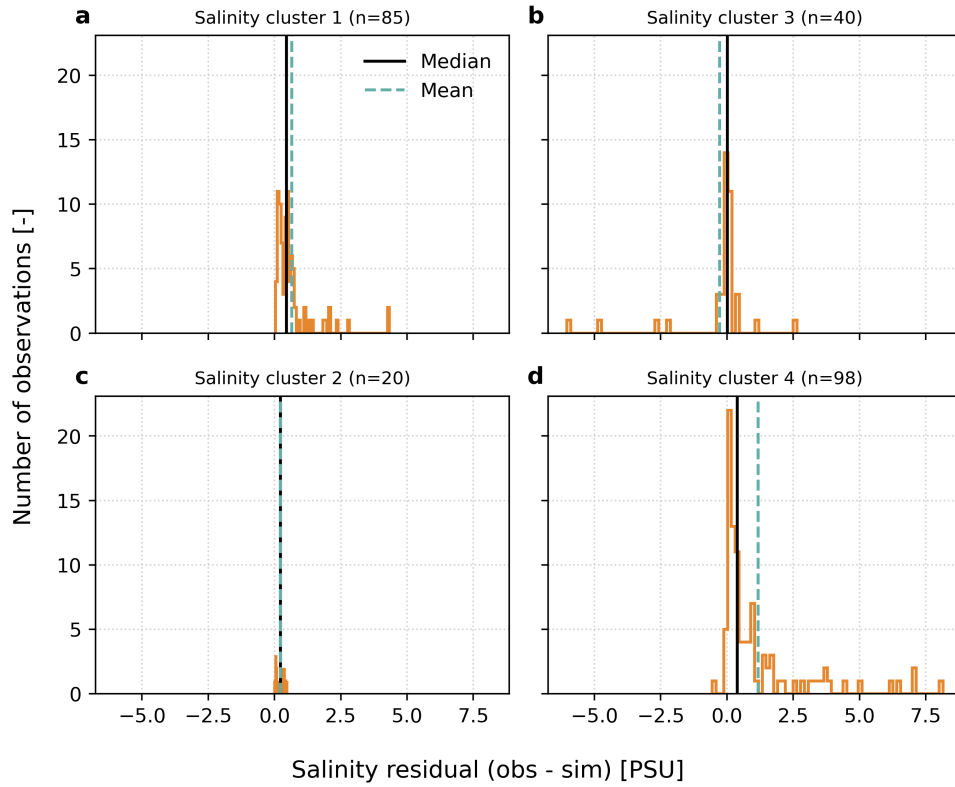

**Fig. S10 The histograms of salinity residual for four salinity clusters.** Salinity residual is defined as the difference between observed and simulated salinity. The cyan dashed line represents the mean residuals for each salinity cluster. The black solid line indicates the median residuals for each salinity cluster. The number in the bracelet shows the total measurements for each cluster.

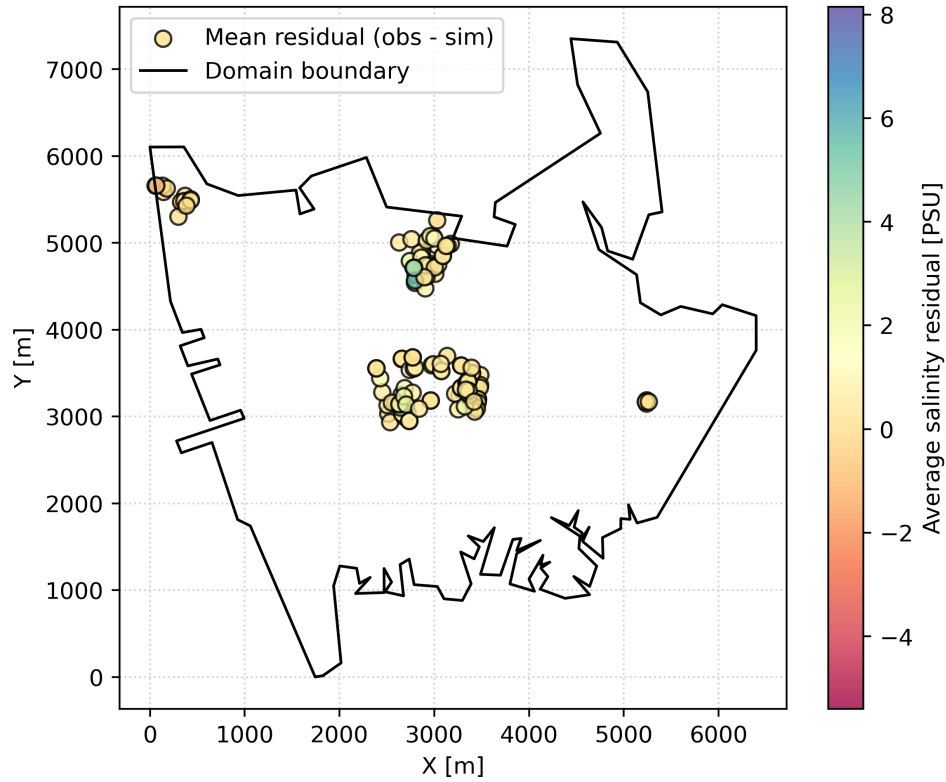

**Fig. S11** The spatial distribution of the average salinity residual. Salinity residual is defined as the difference between observed and simulated salinity. Salinity residual is averaged for each monitoring well. The black solid line represents the boundary of the model domain.

1565  
 1566  
 1567  
 1568  
 1569  
 1570  
 1571  
 1572  
 1573  
 1574  
 1575  
 1576  
 1577  
 1578  
 1579  
 1580  
 1581  
 1582  
 1583  
 1584  
 1585  
 1586  
 1587  
 1588  
 1589  
 1590  
 1591  
 1592  
 1593  
 1594  
 1595  
 1596  
 1597  
 1598  
 1599  
 1600  
 1601  
 1602  
 1603  
 1604  
 1605  
 1606  
 1607  
 1608  
 1609  
 1610

1611 **Supplementary Tables**

1612

1613

1614

**Table S1** Estimated input parameter probability distributions.

1615

1616

1617

1618

1619

1620

1621

1622

1623

1624

1625

1626

1627

1628

1629

1630

1631

1632

1633

1634

1635

1636

**Table S2** Model residual statistics for groundwater-level measurements (m) across monitoring well clusters.

1637

1638

1639

1640

1641

1642

1643

1644

1645

1646

1647

1648

1649

1650

1651

1652

1653

1654

1655

1656

| Parameter [units]                          | Count   | Distribution shape | Statistical variables                                                                       |
|--------------------------------------------|---------|--------------------|---------------------------------------------------------------------------------------------|
| Recharge ratio [-]                         | 167,865 | Exponential power  | 1.8 (shape)<br>-0.017 (location)<br>0.49 (scale)                                            |
| Residual saturation [-]                    | 23,870  | Gamma              | 2.5 (shape)<br>0.12 (location)<br>0.029 (scale)                                             |
| van Genuchten $\alpha$ [Pa <sup>-1</sup> ] | 23,870  | Chi-square         | 3.3 (degrees of freedom)<br>$2.4 \times 10^{-5}$ (location)<br>$4.2 \times 10^{-5}$ (scale) |
| van Genuchten n [-]                        | 23,870  | Cauchy             | 1.4 (location)<br>0.098 (scale)                                                             |
| Permeability [m <sup>2</sup> ]             | 24,477  | Log-normal         | 2.0 (shape)<br>$1.0 \times 10^{-16}$ (location)<br>$1.2 \times 10^{-12}$ (scale)            |
| Porosity [-]                               | 22,659  | Cauchy             | 0.39 (location)<br>0.037 (scale)                                                            |

| Water cluster      | 1     | 2     | 3     | 4     | 5    | 6     | 7    |
|--------------------|-------|-------|-------|-------|------|-------|------|
| Arithmetic mean    | -0.07 | -1.1  | 0.28  | 0.47  | 0.46 | 0.31  | 0.25 |
| Standard deviation | 0.65  | 0.77  | 0.18  | 0.64  | 0.33 | 0.36  | 0.16 |
| <b>Percentiles</b> |       |       |       |       |      |       |      |
| 10th               | -0.91 | -1.8  | 0.035 | -0.17 | 0.16 | -0.33 | 0.05 |
| 25th               | -0.35 | -1.7  | 0.23  | 0.05  | 0.28 | 0.25  | 0.15 |
| 50th (median)      | -0.06 | -1.2  | 0.29  | 0.40  | 0.42 | 0.37  | 0.24 |
| 75th               | 0.42  | -0.72 | 0.38  | 1.10  | 0.60 | 0.50  | 0.35 |
| 90th               | 0.73  | -0.20 | 0.47  | 1.20  | 0.85 | 0.64  | 0.45 |

1657  
 1658  
 1659  
 1660  
 1661  
 1662  
 1663  
 1664  
 1665  
 1666  
 1667  
 1668  
 1669  
 1670  
 1671  
 1672  
 1673  
 1674  
 1675  
 1676  
 1677  
 1678  
 1679  
 1680  
 1681  
 1682  
 1683  
 1684  
 1685  
 1686  
 1687  
 1688  
 1689  
 1690  
 1691  
 1692  
 1693  
 1694  
 1695  
 1696  
 1697  
 1698  
 1699  
 1700  
 1701  
 1702

**Table S3** Model residual statistics for salinity measurements (PSU) across monitoring well clusters.

| Salinity cluster   | 1    | 2    | 3     | 4    |
|--------------------|------|------|-------|------|
| Arithmetic mean    | 0.65 | 0.23 | -0.28 | 1.2  |
| Standard deviation | 0.78 | 0.16 | 1.4   | 1.7  |
| <b>Percentiles</b> |      |      |       |      |
| 10th               | 0.14 | 0.05 | -0.51 | 0.04 |
| 25th               | 0.22 | 0.07 | -0.11 | 0.15 |
| 50th (median)      | 0.45 | 0.22 | -0.01 | 0.39 |
| 75th               | 0.66 | 0.38 | 0.09  | 1.4  |
| 90th               | 1.4  | 0.42 | 0.38  | 3.6  |
